## Morphogen-Lineage Selector Interactions During Surface Epithelial Commitment

Sandra P. Melo<sup>1,3\*</sup>, Jillian M. Pattison<sup>1\*</sup>, Samantha N. Piekos<sup>1\*</sup>, Jessica L. Torkelson<sup>1</sup>, Elizaveta Bashkirova<sup>1,4</sup>, Maxwell R. Mumbach<sup>1,2</sup>, Charlotte Rajasingh<sup>1</sup>, Hanson Hui Zhen<sup>1</sup>, Lingjie Li<sup>1</sup>, Eric Liaw<sup>1,5</sup>, Daniel Alber<sup>1</sup>, Adam J. Rubin<sup>1</sup>, Gautam Shankar<sup>1</sup>, Howard Y. Chang<sup>1,2</sup>, Paul A. Khavari<sup>1</sup>, and Anthony E. Oro<sup>1</sup>

<sup>1</sup>Program in Epithelial Biology, Stanford University School of Medicine, Stanford, CA 94305, USA. <sup>2</sup>Center for Personal Dynamic Regulomes, Stanford, CA 94305, USA.

Current Addresses: <sup>3</sup>Agilent Technologies, Santa Clara, CA 95051, USA. <sup>4</sup>Columbia Stem Cell Initiative, Columbia University Medical Center, New York, NY 10032, USA. <sup>5</sup>David Geffen School of Medicine at UCLA, Los Angeles, CA 90095, USA.

\*These authors contributed equally to this work.

Address correspondence to: Anthony E. Oro [oro@stanford.edu](mailto:oro@stanford.edu)

1           **Human embryonic stem cell (hESC) differentiation promises advances in**  
2 **regenerative medicine<sup>1-3</sup>, yet conversion of hESCs into tissues such as keratinocytes**  
3 **requires a better understanding of epigenetic interactions between the inductive**  
4 **morphogens retinoic acid (RA) and bone morphogenetic protein 4 (BMP), and the**  
5 **master regulator p63<sup>4,5</sup>. Here we develop a robust, defined, keratinocyte**  
6 **differentiation system, and use a multi-dimensional genomics approach to**  
7 **interrogate the contributions of the morphogens and lineage selector to chromatin**  
8 **dynamics during early surface ectoderm commitment. In stark contrast to other**  
9 **master regulators<sup>6-9</sup>, we find using p63 gain and loss of function hESC lines, that p63**  
10 **effects major transcriptional changes only after morphogenetic action. Morphogens**  
11 **alter chromatin accessibility and histone modifications, establishing an epigenetic**  
12 **landscape for p63 to modify. In turn, p63 closes chromatin accessibility and**  
13 **promotes the accumulation of repressive H3K27me3 histone modifications at sites**  
14 **distal to where it binds. Surprisingly, cohesin HiChIP<sup>10</sup> visualization of genome-wide**  
15 **chromosome conformation reveals that both p63 and the morphogens contribute to**  
16 **dynamic long-range genomic interactions that increase the probability of negative**  
17 **transcriptional regulation at p63 target loci. p63-regulated accessibility, not**  
18 **H3K27me3 deposition, appears to drive early transcriptional changes. We illustrate**  
19 **morphogen-selector interactions by studying p63 negative feedback regulation of**  
20 ***TFAP2C*<sup>11</sup>, whereby disruption of the single p63 binding site results in a loss of p63-**  
21 **mediated transcriptional control and dramatic increases in *TFAP2C* and p63**  
22 **expression. Our study reveals the unexpected dependency of p63 on morphogenetic**  
23 **signaling to control long-range chromatin interactions during tissue specification**  
24 **and provides novel insights into how master regulators specify diverse**  
25 **morphological outcomes.**  
26

27           Published protocols of hESC-derived keratinocytes suffer from heterogeneity due  
28 to feeders and additive variability<sup>5,12-15</sup>, thus we developed a xeno-free, chemically-  
29 defined differentiation system based on E6 media<sup>16</sup> supplemented with two morphogens,  
30 RA and BMP4 (Fig. 1a). This system was highly reproducible using hESCs and  
31 recapitulated commitment towards a surface ectoderm fate, indicated by  
32 immunofluorescence (IF) analysis of epithelial markers keratin 18 (K18)<sup>17</sup> and p63<sup>18,19</sup> by  
33 day 7, followed by high levels of p63 and the keratinocyte maturation marker keratin 14  
34 (K14)<sup>20</sup> by day 45 (Fig. 1a). Robust p63 expression occurred only when both  
35 morphogens were present, indicating a synergistic role for p63 accumulation (Fig. 1b,c,  
36 Extended Data Fig. 1). As morphogenetic exposure for 7 days induced both uniform p63  
37 expression and subsequent keratinocyte development<sup>4,5</sup>, we interrogated this key 7-day

38 stage with a multi-dimensional genomics approach to understand the functional  
39 interaction between p63 and the morphogens.

40 To assess the individual contributions to chromatin dynamics, we created p63  
41 gain and loss of function hESCs using CRISPR/Cas9 technology (Fig. 1d,f) to yield a  
42 panel of four cell types: d0 (wild-type hESCs), d0 p63GOF (hESCs ectopically  
43 expressing p63), d7 p63WT (wild-type hESCs morphogen-treated, with endogenous  
44 p63), and d7 p63KO (hESCs morphogen-treated with no p63 expression). We verified  
45 p63 expression in these cell lines through IF, western blot, and sequencing (Fig. 1e,g,  
46 Extended Data Fig. 2).

47 Previous studies indicate that p63 overexpression can drive surface ectoderm  
48 commitment<sup>21</sup>, yet remarkably, expression of p63 in hESCs was insufficient to induce  
49 differentiation (Fig. 1e, Extended Data Fig. 2). Consistent with this observation,  
50 transcriptome analysis using RNA-sequencing (RNA-seq) revealed moderate changes in  
51 expression in roughly 300 genes between d0 and d0 p63GOF cells, whereas more than  
52 2400 genes were differentially expressed in d7 p63WT vs. d7 p63KO cells (Fig. 1h).  
53 Further, independent of the presence or absence of p63, morphogen exposure resulted  
54 in an exit from pluripotency and was required for p63 regulation of key transcription  
55 factors associated with epithelial development (Fig. 1h, Extended Data Fig. 2c). These  
56 important epithelial transcription factors, including TFAP2C, KLF4, GATA3, GRHL2,  
57 MSX2, and ELF3, were all repressed by p63 upon morphogen treatment. We conclude  
58 that morphogenetic signaling promotes a simple epithelial state, while enabling p63 to  
59 modify the morphogen-induced transcriptome to drive these stratified epidermal fates.

60 The striking influence of morphogens on p63 activity led us to investigate  
61 whether differences in p63 genomic occupancy accounted for the altered transcriptional  
62 activity. p63 ChIP-seq in d0 p63GOF and d7 p63WT revealed 7,960 and 6,097 p63  
63 binding sites, respectively, and the p63 motif was significantly enriched under peaks in

64 both datasets (Fig. 1i). Remarkably, over 70% of the sites were identical between both  
65 datasets (Fig. 1j,k), while 17% of peaks were gained in the d0 p63GOF (Extended Data  
66 Fig. 3a). Thus, differences in p63 occupancy cannot explain the dramatic morphogen-  
67 regulated p63 activity.

68 We next characterized how the morphogens and p63 affected chromatin  
69 accessibility and deposition of four histone modifications (H3K27ac, H3K27me3,  
70 H3K4me3, H3K4me1) using the Assay for Transposase Accessible Chromatin followed  
71 by sequencing (ATAC-seq) and histone chromatin immunoprecipitation (ChIP-seq),  
72 respectively. Overall, approximately 20,000 transposase accessible sites changed  
73 during the induction phase, with 14,000 opening and 6,000 closing between d0 and d7  
74 p63WT (Fig. 2a). Additionally, over one third of the morphogen-dependent accessible  
75 sites became even more accessible upon p63 loss (Fig. 2a,d). Comparison of  
76 established histone modifications in d7 p63WT vs. p63KO revealed significant  
77 differences in H3K27me3, yet no observable differences on activating promoter or  
78 enhancer marks (Extended Data Fig. 3). Opposite to ATAC-seq changes, p63 absence  
79 resulted in a significant decrease in signal of the H3K27me3 mark, whereas H3K27me3  
80 increased in d0 p63GOF cells (Fig. 2b,d). ChromHMM analysis indicated most of the  
81 accessibility changes and p63 binding sites occur in enhancers, rather than promoters  
82 (Extended Data Fig. 3). We conclude that p63 edits a subset of the morphogen-induced  
83 accessibility changes and regulates the accumulation of repressive H3K27me3 histone  
84 modifications.

85 Lineage selectors can act both directly on the epigenetic landscape at the site of  
86 binding to alter accessibility or histone modification deposition, or indirectly at a  
87 distance<sup>22</sup>. To determine how p63 acts, we intersected the p63-dependent H3K27me3  
88 regions and morphogen-dependent accessible sites with p63 binding sites, revealing  
89 that few of the p63 binding sites overlapped with either of these changing elements (Fig.

90 2e). These data indicate that most of the p63 epigenetic regulatory action occurs distal  
91 to p63 binding. Interestingly, when we assigned p63 binding sites, morphogen-  
92 dependent accessible sites, and differential H3K27me3 regions to the nearest genes  
93 through GREAT, we found that these elements converge on a common gene set,  
94 despite each being distinct genomic regions (Fig. 2f, Extended Data Fig. 3).

95 To assess the connectivity and dynamics of the three-dimensional architecture  
96 between these distinct genomic regions, we employed cohesin HiChIP, a recent method  
97 analogous to Hi-C<sup>10</sup>, in all four cell types. We identified high-confidence chromatin  
98 contacts with 10 kb resolution using FitHiC<sup>23</sup> (Extended Data Fig. 4) and demonstrated  
99 that 53% of p63 ChIP-seq peaks in d7 p63WT cells participate in these chromatin  
100 connections (Fig. 3a). Additionally, we illustrated that most morphogen and p63-  
101 dependent dynamic elements also participate in looping connections. Notably, only 34%  
102 of genes GREAT identified as having transcriptional start sites (TSSs) connected to p63  
103 binding sites were verified by cohesin HiChIP, reinforcing the non-uniformity of the  
104 existing chromatin landscape (Extended Data Fig. 3,5).

105 For the 4,409 protein-coding, p63-dependent genes, we determined the  
106 connectivity of their TSSs to a p63 binding site (Fig. 3b), revealing that 13% of these  
107 genes were in direct contact with p63 via chromatin looping (1°) and 11% were in  
108 contact via an indirect connection through a morphogen-dependent accessible site or  
109 H3K27me3 element (2°). Although more complex conformations through multiple  
110 elements (3°) were detected, random simulation demonstrated that p63 was not  
111 connected to p63-dependent genes by 3° connections at a frequency above random  
112 chance (FDR < 0.005); thus we focused on the 0°, 1°, and 2° p63 connections (Fig. 3b,  
113 Extended Data Fig. 6).

114 We further interrogated the correlation between p63 connection to the TSS and  
115 transcriptional regulation, finding that p63 connectivity was insufficient to regulate gene

116 expression. However, both p63-dependent and -independent genes connected to a p63  
117 site were involved in organ development and cell differentiation, consistent with known  
118 p63 function (Fig. 3c)<sup>7,8</sup>. Additionally, the probability of transcriptional repression was  
119 significantly higher at genes connected to p63 (Fig. 3d). d7 p63-independent genes  
120 connected to p63 include keratinocyte differentiation genes whose expression becomes  
121 p63-dependent later during keratinocyte maturation, including p63 itself, MAFB, JAG1,  
122 ID2, and the Epidermal Differentiation Cluster (Extended Data Table 1)<sup>24-26</sup>. These data  
123 suggest that p63 and morphogen-regulated chromatin connections foreshadow future  
124 gene action. In all, we demonstrated that a large subset of the morphogen and p63-  
125 dependent elements are physically connected at d7 (Fig. 3e), accounting for the ability of  
126 p63 to regulate the epigenetic landscape at a distance.

127         Next, we determined the extent to which p63 and the morphogens influenced  
128 connectivity (Fig. 3f). In 1<sup>o</sup> (middle panel) and 2<sup>o</sup> (right panel) connections, contacts  
129 between morphogen-dependent accessible sites and p63 binding sites were regulated  
130 by both the morphogens and p63, with loss of p63 abolishing the connections, while  
131 overexpression of p63 failed to enhance them. Conversely, p63-H3K27me3 and p63-  
132 TSS interactions were enhanced by the morphogens and p63 overexpression, and  
133 weakened by p63 loss (Extended Data Fig. 7). Finally, we determined that of the 3D-  
134 conformations connecting p63 to a TSS, the connections to both morphogen-dependent  
135 accessible sites (Fig. 3g) and TSSs demonstrated greater repression than p63  
136 connected via an H3K27me3 peak (Extended Data Fig. 7). These findings indicate that  
137 for optimal p63-regulated transcription both the morphogens and p63 are needed.

138         From our global analyses, we identified TFAP2C, a critical epithelial regulator<sup>11</sup>,  
139 as a gene induced by morphogens and repressed by p63 that exhibits a complex  
140 chromatin architecture driving its regulation. We sought to illustrate the p63-morphogen  
141 interactions by dissecting the p63 negative feedback regulation of this key

142 developmental regulator (Fig. 4). Cohesin HiChIP and genomic analysis at this locus  
143 (Fig. 4a, Extended Data Fig. 8) revealed a distal p63 binding site with three d7 p63WT  
144 connections to the TSS: through a direct contact, the adjacent morphogen-dependent  
145 accessible site, and the distal H3K27me3 peak, all within 400 kb. We confirmed our  
146 cohesin HiChIP with UMI-4C<sup>27</sup>, a locus-specific technique, using primer viewpoints  
147 around the three connections (Extended Data Fig. 9).

148         Comparison of the chromosome conformation among the different cell lines  
149 indicated that p63 presence enhances connectivity to all three of the main loops at d7  
150 and in the absence of p63, the connections and transcriptional output collapse.  
151 Morphogen exposure connects p63 to the induced neighboring morphogen-dependent  
152 accessible site, but the connection relies on ongoing p63 expression to maintain it, as  
153 loss of p63 fails to uphold it despite morphogen presence. Thus, our analysis of the  
154 *TFAP2C* locus shows that both the morphogens and p63 contribute to proper regulation.

155         To validate the importance of the morphogen-dependent accessible site, we  
156 removed the region using CRISPR/Cas9 and demonstrated a loss of morphogen-  
157 induced *TFAP2C* expression (Extended Data Fig. 8b). Furthermore, we hypothesized  
158 that removal of the p63 binding site should drive both *TFAP2C* and p63 expression,  
159 given our observation that *TFAP2C* induces p63 expression in hESCs (unpublished  
160 results) and that p63 provides important early negative regulation of *TFAP2C*. To test  
161 this, we deleted the p63 binding site (p63BSKO) and found dramatically elevated levels  
162 of *TFAP2C* at d7, consistent with the predicted negative feedback modulation of  
163 *TFAP2C* by p63 (Fig. 4b,c). Moreover, d7 p63BSKO cells showed increased expression  
164 of p63, demonstrating the need for tight p63-morphogen regulation to control the levels  
165 of key developmental factors. Histone ChIP-qPCR revealed a loss of H3K27me3  
166 accumulation at both the TSS and the distal H3K27me3 site in d7 p63BSKO cells, while  
167 other non p63-connected sites remained unaffected (Fig. 4d). Similarly, the morphogen-

168 dependent accessible site became more accessible in d7 p63BSKO cells, to levels  
169 found in d7 p63KO cells (Fig. 4d), confirming the connectivity of these distal elements.

170 Here we deepen our understanding of the interplay between morphogens and  
171 lineage selectors during surface ectoderm commitment, and find the surprising inability  
172 for the lineage selector p63 to function in the absence of morphogen action. Morphogens  
173 provide the powerful driving force for cell state change by inducing expression of the  
174 lineage factor while also altering chromatin accessibility, histone modifications, and  
175 chromosome conformation. p63, in turn, further modifies the morphogen-dependent  
176 epigenetic landscape to drive surface ectoderm differentiation. Further, our results  
177 illustrate how chromatin connections to the lineage selector p63 are necessary and more  
178 likely to induce gene expression changes, but are not sufficient. Our finding that p63 at  
179 d7 is poised to act on later keratinocyte differentiation genes (Extended Data Table 1)<sup>24-</sup>  
180 <sup>26</sup> suggests the existence of additional inductive influences after addition of RA/BMP that  
181 will enable broader p63-dependent transcription. This is functionally similar to “poised”  
182 histone modifications and provides a structural explanation of how the order of  
183 morphogen exposure can determine downstream transcriptional programs. This study  
184 has important implications for the apparent autonomy of lineage selectors and for the  
185 basis of morphogenesis. Our work suggests that small changes in morphogen activity  
186 can dramatically alter the induced chromosome landscape and connectivity, explaining  
187 how a single lineage selector like p63 can direct such a panoply of transcriptional  
188 programs depending on the specific morphogen exposure.

189



190 **References**

- 191 1. Walmsley, G.G., *et al.* Induced pluripotent stem cells in regenerative medicine  
192 and disease modeling. *Curr Stem Cell Res Ther* **9**, 73-81 (2014).
- 193 2. Inoue, H., Nagata, N., Kurokawa, H. & Yamanaka, S. iPS cells: a game changer  
194 for future medicine. *The EMBO journal* **33**, 409-417 (2014).
- 195 3. Hanna, J., *et al.* Treatment of sickle cell anemia mouse model with iPS cells  
196 generated from autologous skin. *Science* **318**, 1920-1923 (2007).
- 197 4. Umegaki-Arao, N., *et al.* Induced pluripotent stem cells from human revertant  
198 keratinocytes for the treatment of epidermolysis bullosa. *Sci Transl Med* **6**,  
199 264ra164 (2014).
- 200 5. Sebastiano, V., *et al.* Human COL7A1-corrected induced pluripotent stem cells  
201 for the treatment of recessive dystrophic epidermolysis bullosa. *Sci Transl Med* **6**,  
202 264ra163 (2014).
- 203 6. Zaret, K.S. & Carroll, J.S. Pioneer transcription factors: establishing competence  
204 for gene expression. *Genes & development* **25**, 2227-2241 (2011).
- 205 7. Yang, A., *et al.* p63 is essential for regenerative proliferation in limb, craniofacial  
206 and epithelial development. *Nature* **398**, 714-718 (1999).
- 207 8. Mills, A.A., *et al.* p63 is a p53 homologue required for limb and epidermal  
208 morphogenesis. *Nature* **398**, 708-713 (1999).
- 209 9. Lupien, M., *et al.* FoxA1 translates epigenetic signatures into enhancer-driven  
210 lineage-specific transcription. *Cell* **132**, 958-970 (2008).
- 211 10. Mumbach, M.R., *et al.* HiChIP: efficient and sensitive analysis of protein-directed  
212 genome architecture. *Nature methods* **13**, 919-922 (2016).
- 213 11. Qiao, Y., *et al.* AP2gamma regulates neural and epidermal development  
214 downstream of the BMP pathway at early stages of ectodermal patterning. *Cell*  
215 *research* **22**, 1546-1561 (2012).

- 216 12. Metallo, C.M., Ji, L., de Pablo, J.J. & Palecek, S.P. Retinoic acid and bone  
217 morphogenetic protein signaling synergize to efficiently direct epithelial  
218 differentiation of human embryonic stem cells. *Stem cells* **26**, 372-380 (2008).
- 219 13. Itoh, M., *et al.* Generation of 3D skin equivalents fully reconstituted from human  
220 induced pluripotent stem cells (iPSCs). *PloS one* **8**, e77673 (2013).
- 221 14. Guenou, H., *et al.* Human embryonic stem-cell derivatives for full reconstruction  
222 of the pluristratified epidermis: a preclinical study. *Lancet* **374**, 1745-1753 (2009).
- 223 15. Coraux, C., *et al.* Reconstituted skin from murine embryonic stem cells. *Curr Biol*  
224 **13**, 849-853 (2003).
- 225 16. Chen, G., *et al.* Chemically defined conditions for human iPSC derivation and  
226 culture. *Nature methods* **8**, 424-429 (2011).
- 227 17. Owens, D.W. & Lane, E.B. The quest for the function of simple epithelial keratins.  
228 *BioEssays : news and reviews in molecular, cellular and developmental biology*  
229 **25**, 748-758 (2003).
- 230 18. Senoo, M., Pinto, F., Crum, C.P. & McKeon, F. p63 Is essential for the  
231 proliferative potential of stem cells in stratified epithelia. *Cell* **129**, 523-536  
232 (2007).
- 233 19. Koster, M.I. & Roop, D.R. Mechanisms regulating epithelial stratification. *Annu*  
234 *Rev Cell Dev Biol* **23**, 93-113 (2007).
- 235 20. Green, H., Easley, K. & Iuchi, S. Marker succession during the development of  
236 keratinocytes from cultured human embryonic stem cells. *Proceedings of the*  
237 *National Academy of Sciences of the United States of America* **100**, 15625-  
238 15630 (2003).
- 239 21. Aberdam, E., *et al.* A pure population of ectodermal cells derived from human  
240 embryonic stem cells. *Stem cells* **26**, 440-444 (2008).

- 241 22. Wamstad, J.A., *et al.* Dynamic and coordinated epigenetic regulation of  
242 developmental transitions in the cardiac lineage. *Cell* **151**, 206-220 (2012).
- 243 23. Ay, F., Bailey, T.L. & Noble, W.S. Statistical confidence estimation for Hi-C data  
244 reveals regulatory chromatin contacts. *Genome research* **24**, 999-1011 (2014).
- 245 24. Barton, C.E., *et al.* Novel p63 target genes involved in paracrine signaling and  
246 keratinocyte differentiation. *Cell death & disease* **1**, e74 (2010).
- 247 25. Koh, L.F., Ng, B.K., Bertrand, J. & Thierry, F. Transcriptional control of late  
248 differentiation in human keratinocytes by TAp63 and Notch. *Exp Dermatol* **24**,  
249 754-760 (2015).
- 250 26. Truong, A.B., Kretz, M., Ridky, T.W., Kimmel, R. & Khavari, P.A. p63 regulates  
251 proliferation and differentiation of developmentally mature keratinocytes. *Genes*  
252 *& development* **20**, 3185-3197 (2006).
- 253 27. Schwartzman, O., *et al.* UMI-4C for quantitative and targeted chromosomal  
254 contact profiling. *Nature methods* **13**, 685-691 (2016).
- 255

256 **Acknowledgements**

257 We thank members of the Oro Laboratory, P. Greenside, J. Wysocka, A. Kundaje, O.  
258 Wapinski, and D. Webster for helpful discussions and comments. This work was  
259 supported by CIRM Tools grant RT3-07796 (A.E.O.), NIH/NIAMS grant F32AR070565  
260 (J.M.P.), and NIH P50 HG007735 (H.Y.C.).

261

262 **Author Contributions**

263 S.P.M. and J.M.P. designed and executed experiments, analyzed data, and wrote the  
264 manuscript. S.N.P. analyzed data and edited the manuscript. J.L.T., E.B., M.R.M., C.R.,  
265 H.H.Z., and L.L. executed experiments and contributed to experimental design. E.L.,  
266 D.A., A.J.R., and G.S. contributed to data analysis. H.Y.C. and P.A.K. contributed to  
267 experimental design. A.E.O. designed experiments, analyzed data, wrote the  
268 manuscript, and conceived the project with S.P.M.

269

270 **Author Information**

271 These authors contributed equally to this work.

272 Sandra P. Melo, Jillian M. Pattison, & Samantha N. Piekos

273

274 Affiliations

275 Program in Epithelial Biology, Stanford University School of Medicine, Stanford,  
276 California, USA

277 Sandra P. Melo, Jillian M. Pattison, Samantha N. Piekos, Jessica L. Torkelson, Elizaveta  
278 Bashkirova, Maxwell R. Mumbach, Charlotte Rajasingh, Hanson Hui Zhen, Lingjie Li,  
279 Daniel Alber, Adam J. Rubin, Gautam Shankar, Howard Y. Chang, Paul A. Khavari, &  
280 Anthony E. Oro

281

282 Center for Personal Dynamic Regulomes, Stanford, CA 94305, USA

283 Maxwell R. Mumbach & Howard Y. Chang

284

285 Current Addresses

286 Agilent Technologies, Santa Clara, CA 95051, USA

287 Sandra P. Melo

288

289 Columbia Stem Cell Initiative, Columbia University Medical Center, New York, NY

290 10032, USA

291 Elizaveta Bashkirova

292

293 David Geffen School of Medicine at UCLA, Los Angeles, CA 90095, USA

294 Eric Liaw

295

296 Corresponding Author

297 Correspondence to Anthony E. Oro: [oro@stanford.edu](mailto:oro@stanford.edu)

298

299 Competing Interests

300 The authors declare no competing financial interests.

301 **Figure Legends**

302 **Figure 1.** Morphogens and the lineage selector p63 cooperate to drive early stratified  
303 epithelial differentiation. (a) Differentiation of hESCs into keratinocytes takes 60 days in  
304 the xeno-free, defined system. Treatment with RA and BMP4 for 7 days induces K18  
305 and p63 expression. Switching the cells into keratinocyte media allows for selection and  
306 growth of functional keratinocytes (kc) that express K14 and p63. (b,c) hESCs need  
307 exposure to both RA and BMP4 to achieve high p63 expression. Error bars represent  
308 standard deviation. (d) Strategy for generating the d0 p63GOF cell line. Numbered black  
309 boxes signify exons. (e) Expression of p63 in the d0 p63GOF line, showing even with  
310 Dox treatment, there is no loss in Oct4 expression. (f) Strategy for generating the p63KO  
311 line, using a two gRNA CRISPR/Cas9 approach. (g) IF validation of the p63KO line,  
312 showing loss of p63 expression and higher levels of K18. All IF scale bars represent 50  
313  $\mu\text{m}$ . (h) Differential expression analysis from RNA-seq (measured by DESeq2) between  
314 the d0 and d0 p63GOF lines (upper panel), and the d7 p63WT and p63KO lines (lower  
315 panel). The gray dots on the scatter plot represent no change in gene expression  
316 between the two cell types, while red represents increased expression in the d0 or d7  
317 wild type by a  $> 2$  fold change and blue represents decreased expression in the d0 or d7  
318 wild type by a  $< -2$  fold change. Key transcription factors associated with epithelial  
319 development are induced by the morphogens and repressed by p63 at d7. (i) The p63  
320 motif was the most significantly recovered motif under p63 ChIP-seq peaks in d0  
321 p63GOF and d7 p63WT cells. (j) p63 binds distal to TSSs as depicted at the *HES1* locus  
322 (70 kb away) and to the same sites in d0 p63GOF and d7 p63WT. (k) p63 binds to  
323 similar sites genome-wide with and without morphogen presence, as depicted in the  
324 Venn Diagram. The majority of the d7 p63 binding sites are fully recovered in the d0  
325 p63GOF line.

326

327 **Figure 2.** The morphogens establish an epigenetic landscape that p63 modifies at a  
328 distance. (a) Differential accessible regions between d0 and d7 p63WT as analyzed  
329 using DESeq2 on ATAC-seq signal. Heatmaps represent the signal at these ATAC  
330 regions within the various cell types and assays: p63 ChIP-seq signal (red, left panel),  
331 ATAC-seq signal (blue, middle panel), and H3K27me3 ChIP-seq signal (purple, right  
332 panel). 14,191 differential regions become more accessible upon morphogen treatment  
333 (morphogen-dependent). (b) Differential H3K27me3 regions between d7 p63WT and  
334 p63KO as analyzed by DESeq2. Heatmaps represent the same datasets as (a) only  
335 signal is shown at differential H3K27me3 sites (3,793 sites). (c) ATAC-seq (blue) and  
336 H3K27me3 (purple) signal at p63 binding sites (red). (d) Signal intensities of p63 ChIP-  
337 seq, ATAC-seq, and H3K27me3 ChIP-seq shown at the *TFAP2A* locus. (e) The overlap  
338 of genomic regions that are differential as measured in (a), (b), and (c). The genomic  
339 location intersect is very low. (f) GREAT analysis linking the above differential regions to  
340 the closest gene shows that these elements converge on a similar gene set. While their  
341 physical genomic locations do not overlap, they are linked to a common gene via  
342 GREAT.

343

344 **Figure 3.** p63 - TSS connections are associated with negative regulation genome-wide.  
345 (a) Number of p63 binding sites (BS), p63-dependent (p63-dep) H3K27me3 sites,  
346 morphogen-dependent (morph-dep) ATAC sites, and p63-dependent TSSs that  
347 participate in chromatin looping (Anchored, red) vs those that do not (Not Anchored,  
348 blue) in d7 p63WT cells. (b) Percentage of p63-independent (p63-indep) genes (blue)  
349 and p63-dep genes (red), whose TSS is connected to p63 by direct binding (0°), direct  
350 contact (1°), or connected via one (2°) or two (3°) morph-dep ATAC and/or p63-dep  
351 H3K27me3 elements. (c) Gene Ontological Terms associated with p63-indep genes  
352 (blue) and p63-dep genes (red), which are connected to p63. (d) ecdf of the log2 fold

353 change in gene expression between d7 p63WT vs d7 p63KO cells (d7 p63KO / d7  
354 p63WT) for all p63 connected genes (red) and p63 1° connected genes (blue) compared  
355 to all genes (black). (e) 1° contact connections between p63 BS (red), p63-dep  
356 H3K27me3 (gold), and morph-dep ATAC (blue). (f) Change in connectivity strength  
357 between various cell types of all contacts (left panel), p63 - morph-dep ATAC contacts  
358 (middle panel), and p63 - morph-dep ATAC contacts in which both elements are  
359 connected to the TSS (right panel). n = number of contacts. (g) ecdf of the change in  
360 expression level (d7 p63WT vs d7 p63KO) of genes whose TSS is connected to a p63  
361 BS and morph-dep ATAC site, which in turn are connected to each other (green)  
362 compared to all genes (black). FDR by monte carlo simulation  
363 \*\*FDR<0.01, \*\*\*FDR<0.001. Angela-Darling k-samples test \*\*\*\*p<1x10<sup>-10</sup>.

364

365 **Figure 4.** p63 negatively regulates TFAP2C expression through morphogen-induced  
366 and p63-dependent distal elements and connectivity. (a) Cohesin HiChIP reveals  
367 complex looping interactions between numerous distal elements at the *TFAP2C* locus.  
368 Schematic for the morphogen and p63-dependent interactions (top panel) with virtual 4C  
369 plots of the normalized cohesin HiChIP data below (bottom panel). (b) The p63 binding  
370 site was deleted using CRISPR/Cas9 to determine the effects of its loss on TFAP2C  
371 expression. p63BSKO is a 520 bp deletion surrounding the p63 ChIP-seq peak. (c)  
372 Deletion of the p63 binding site leads to an increase in TFAP2C expression similar to the  
373 levels seen in the d7 p63KO cells (NS - not significant). Loss of TFAP2C expression also  
374 leads to a dramatic increase in p63 expression. Relative pixel intensity was calculated  
375 from 3 independent images and scale bars represent 20 μm. (d) ChIP-qPCR for  
376 H3K27me3 at the *TFAP2C* locus shows a decrease in the histone mark in the d7  
377 p63BSKO cells, similar to the d7 p63KO cells (\*p-value < 0.01). ATAC-qPCR at this  
378 locus shows an increase in accessibility at the d7 ATAC peak in d7 p63BSKO, again



379 similar to the d7 p63KO (\*p-value < 0.05). Deletion of the p63 binding site results in a  
380 loss of tightly controlled TFAP2C expression. Both graphs depict signal relative to input  
381 and error bars represent standard error of the mean.  
382

383 **Methods**

384 **CRISPR/Cas9 guided genome editing**

385 gRNAs were designed using the online tool available at <http://crispr.mit.edu/><sup>28</sup>, selected  
386 based on the highest scores and the least off-targets, and incorporated into a DNA  
387 fragment bearing all the components necessary for gRNA expression<sup>29</sup>. Donor  
388 sequences were designed by selecting 700 bp arms flanking left and right of the region  
389 to be modified. Both gRNAs and donor sequences were synthesized as 5-  
390 phosphorylated gene blocks (IDT) and cloned into a blunted plasmid with puromycin  
391 selection, except for gRNAs targeting the AAVS1 locus, which were acquired through  
392 Addgene (Plasmid # 72833)<sup>30</sup>. The d0 p63GOF line was generated by integrating the  
393 humanized p63 mouse cDNA under the control of a Tetracycline Responsive Element  
394 (TRE) to the AAVS1 locus. Doxycycline (Sigma) was added to the media for 2 days at a  
395 concentration of 2 ug/ml to induce expression of p63 in hESCs.

396

397 **hESC culture and transfection**

398 H9 human embryonic stem cells were cultured on Vitronectin Recombinant Human  
399 Protein (Life Technologies) in Essential 8 medium (E8, Life Technologies) as described  
400 previously<sup>16</sup>. Cells were passaged every three days as clumps with 0.5 mM EDTA  
401 (Lonza). For transfection,  $2 \times 10^6$  cells were nucleofected using Amaxa<sup>TM</sup> P3 Primary  
402 Cell 4D-Nucleofector (Lonza) as recommended by the manufacturer, with no more than  
403 a 10 uL mix of 2 ug of plasmid carrying each gRNA, 2 ug of plasmid carrying hCas9 and  
404 2-4 ug of plasmid carrying the donor DNA to repair the Cas9/gRNA induced break by  
405 homologous recombination. Cells were plated and allowed to recover for a minimum of  
406 6h in E8 media supplemented with 2 uM thiazovivin (Stemgent). Drug selection with 1  
407 ug/mL puromycin (InvivoGen) started 48h after transfection and lasted 2 days for loss of

408 function cell lines, or continued for several days for gain of function cell line. Colonies  
409 were picked 10 days after selection and genotyped by PCR to confirm homozygosity.

410

#### 411 ***In vitro* epithelial hESC differentiation**

412 For differentiation,  $6.2 \times 10^3$  cells/cm<sup>2</sup> were plated as colonies on Vitronectin coated  
413 plates. Next day, media was changed to Essential 6 (E6, Life Technologies)  
414 supplemented with 1  $\mu$ M RA (Sigma) and 5 ng/mL Recombinant Human BMP-4 (R&D  
415 Systems), and replaced every two days for seven days, at which point cells were  
416 dissociated with Accutase (StemCell Technologies) and collected for downstream  
417 analysis, or media was replaced to Defined Keratinocyte-SFM media (DKSFM, Life  
418 Technologies) for terminal differentiation into keratinocytes.

419

#### 420 **Immunofluorescence staining**

421 Cells were cultured on glass cover slips in 12 wells, subjected to the appropriate  
422 treatment and fixed for 10 min at room temperature in 4% paraformaldehyde in PBS.  
423 Cells were permeabilized for 10 min with permeabilization buffer (0.1% Triton-X + 0.05%  
424 Tween-20 in PBS) and blocked for 30 min with 10% Horse Serum (Vector Laboratories)  
425 in permeabilization buffer. Antibodies at appropriate dilutions were incubated overnight  
426 at 4°C. Secondary antibodies were added at 1:500 dilution and incubated at room  
427 temperature protected from light for 1h. Cells were washed three times in Hoechst  
428 1:10,000 in PBS, and glass cover slips were mounted onto glass slides with mounting  
429 medium before imaging. Antibodies were diluted in permeabilization buffer at the  
430 indicated dilutions: AP-2 $\gamma$  (1:100, Cell Signaling 2320S), p63 (1:200, Genetex  
431 GTX102425), KRT18 (1:800, R&D AF7619), KRT14 (1:1000, BioLegend 906001), OCT4  
432 (1: 100, BioLegend 631902).

433

434 **RNA extraction and library preparation**

435 For RNA extraction, cells were lysed directly in Trizol (Invitrogen), purified as indicated  
436 by the manufacturer, and then run through RNeasy columns (Qiagen). Libraries for  
437 RNA-seq were prepared using TrueSeq RNA Library Prep Kit v2 (Illumina) according to  
438 the manufacturer's protocol. Real time PCR was performed with SYBR Green PCR  
439 master mix (Life Technologies) and in a Stratagene real time PCR machine.

440

441 **Chromatin immunoprecipitation (ChIP) and library preparation**

442 Cells were cross-linked in suspension for 10 min using freshly prepared 1%  
443 formaldehyde (Thermo Scientific) in PBS. Subsequently, glycine was added to a final  
444 concentration of 0.125 M to quench formaldehyde, and cells were washed twice with  
445 cold PBS.  $60 \times 10^6$  or  $10 \times 10^6$  cross-linked cells were used per ChIP for p63 or histone  
446 marks, respectively. Cells were lysed in lysis buffer (50 mM Tris-HCl pH 8.0, 10 mM  
447 EDTA, 0.5% SDS, 1X protease inhibitors) for 30 minutes on ice and sonicated for 2h  
448 using a Bioruptor (Diagenode) to achieve a chromatin size between 200 and 300 bp.  
449 Chromatin was centrifuged to remove debris, quantified and diluted in dilution buffer (50  
450 mM Tris-HCl pH 8.0, 10 mM EDTA, 1X protease inhibitors) to achieve a 0.1% SDS final  
451 concentration. Sheared chromatin was incubated overnight at 4° with appropriate  
452 antibodies, followed by incubation with 30 uL of agarose G beads (Invitrogen) for 4h at  
453 4°C. Antibodies were used at the indicated concentrations per ChIP (per  $10 \times 10^6$  cells):  
454 p63 (12 uL, Active Motif 39739), H3K4me3 (5 ug, Abcam ab8580), H3K4me1 (5 ug,  
455 Abcam ab8895), H3K27Ac (5 ug, Abcam ab4729), H3K27me3 (5 ug, Millipore 07-449).  
456 Beads were washed twice each with low salt buffer (50 mM Tris-HCl pH 8.0, 0.15 M  
457 NaCl, 1 mM EDTA pH 8.0, 0.1% SDS, 1% triton X-100, 0.1% sodium deoxycholate),  
458 high salt buffer (50 mM Tris-HCl pH 8.0, 0.5 M NaCl, 1 mM EDTA pH 8.0, 0.1% SDS,  
459 1% triton X-100, 0.1% sodium deoxycholate), and LiCl buffer (50 mM Tris-HCl pH 8.0,

460 0.15 M LiCl, 1 mM EDTA pH 8.0, 1% Nonidet P-40, 0.1% sodium deoxycholate). DNA  
461 was eluted in 100  $\mu$ L of elution buffer (50 mM NaHCO<sub>3</sub>, 1% SDS) and crosslinks were  
462 reversed with 4  $\mu$ L of 5 M NaCl incubated overnight at 67°C. RNA was removed by  
463 adding 1  $\mu$ L of 10 mg/mL RNase A and incubating for 30 min at 37°C. DNA was cleaned  
464 using the Qiagen Qiaquick PCR purification kit and quantified using Qubit (Invitrogen).  
465 Between 5 and 10 ng of pooled DNA were used for library preparation using NEBNext kit  
466 (New England Biolabs) and Agencourt AMPure XP beads (Beckman) according to the  
467 manufacturer's protocol. Single-read libraries were sequenced on Illumina NextSeq  
468 sequencer.

469

#### 470 **Assay for Transposase Accessible Chromatin (ATAC-seq)**

471 ATAC-seq was performed as described<sup>31</sup>. Briefly, after treatment with Accutase, 7x10<sup>4</sup>  
472 cells were washed with cold PBS and lysed using 0.1% NP40 in RSB buffer. Nuclei  
473 pellets were Tn5 transposed using the DNA Sample Preparation Kit from Nextera®.  
474 Libraries were amplified for 9-15 total cycles using the Ad1 and Ad 2.1-2.16 barcodes.  
475 Libraries were purified using the Min-Elute columns (Qiagen) and eluted with 10  $\mu$ L of  
476 buffer EB. Library DNA concentrations were determined with Bioanalyzer High-  
477 Sensitivity DNA analysis kit (Agilent). Paired-end libraries were sequenced initially on a  
478 MiSeq sequencer and analyzed using a custom script to determine the signal  
479 enrichment over background at TSSs over a 2 kb window.(

480 <https://www.encodeproject.org/data-standards/atac-seq/>) Only libraries that had  
481 enrichment scores above 6 were sequenced deeper in a NextSeq Illumina sequencer.

482

#### 483 **Cohesin HiChIP**

484 In situ chromosome conformation capture (3C) was performed as described earlier<sup>10</sup>.  
485 Briefly, 25x10<sup>6</sup> cells were crosslinked and digested with Mbol (NEB). After digest, biotin

486 was incorporated into the sticky ends of fragments before ligation. Cohesin ChIP was  
487 performed to enrich for proximity ligations bound to cohesin, using an SMC1 antibody  
488 (Bethyl, A300-055A). The library quality was assessed on a MiSeq sequencer before  
489 sequencing on an Illumina HiSeq. Three replicates were pooled and sequenced across  
490 two HiSeq lanes for a total of 1200 million reads per sample.

491

#### 492 **UMI-4C**

493 UMI-4C was performed as described previously<sup>27</sup>. Briefly,  $1 \times 10^7$  cells were crosslinked in  
494 suspension with 1% formaldehyde then quenched with glycine, and pelleted cells were  
495 lysed in 1 mL fresh cold lysis buffer (50 mM Tris-HCl, pH 7.5, 150 mM NaCl, 5 mM  
496 EDTA, 0.5% NP-40, 1% TX-100, 1x protease inhibitors) on ice. The nuclei were  
497 extracted and resuspended in water, DpnII buffer, and 10% SDS for DpnII digestion.  
498 Three rounds of DpnII digestion were performed, adding 200 U of HC DpnII (NEB) for 2  
499 hours, incubating overnight, and then 2 more hours all at 37°C with rotation. After  
500 inactivation of DpnII, the 3C reactions were diluted to 7 mL and 13.6 uL of HC T4 ligase  
501 (NEB) were added for overnight ligation at 16°C. Crosslinks were reversed overnight at  
502 65°C with Proteinase K (Qiagen) and DNA was treated with RNase A (Qiagen) for 45  
503 minutes at 37°C. The DNA was then purified with one phenol-chloroform extraction  
504 (ThermoScientific) and ethanol precipitation, and resuspended in 150 uL of 10 mM Tris-  
505 HCl, pH 8.0. DNA was quantified using Qubit before proceeding with library  
506 preparations. Aliquots of chromatin were taken before and after DpnII digestion and after  
507 overnight ligation to determine efficiency of enzymatic reactions. UMI-4C library  
508 preparation was performed as described previously<sup>27</sup>. Briefly, 5-10 ug of 3C library was  
509 sonicated in a Diagenode Bioruptor to achieve a chromatin size between 400 and 600  
510 bp. End-repair (NEB kit), A-tailing (NEB kit) and 5'-dephosphorylation (NEB) of ends  
511 were performed as recommended by the manufacturer. TruSeq Illumina indexed

512 adapters were ligated to the 3'-end of the DNA using Quick Ligase (NEB). Libraries were  
513 generated by nested PCR at particular genomic loci using GoTaq Hot Start Polymerase  
514 (Promega) and 200 ng of DNA template (Extended Data Fig. 9). The primer for the  
515 second PCR included the Illumina dangling adaptor for enrichment of the product from  
516 the first PCR, as described<sup>27</sup>. Paired-end libraries were sequenced in the NextSeq  
517 sequencer.

518

### 519 **Next Generation Sequencing processing of ChIP-seq and ATAC-seq data**

520 Quality control of fastq files was done with FASTQC<sup>32</sup>. Sequence alignment to hg19 was  
521 performed using tophat for RNA-seq (parameters: p 10 --library-type fr-firststrand -r 100 -  
522 -mate-std-dev 100), or bowtie2<sup>33</sup> for ChIP-seq (parameters: -p 24 -S -a -m 1 --best -  
523 strata) and ATAC-seq (parameters: -p 24 -S -m 1 -X 2000). Aligned reads were  
524 processed to remove PCR duplicates using samtools<sup>34</sup> and mitochondrial DNA (for  
525 ATAC-seq datasets). Peak calling was carried out with MACS2<sup>35</sup> using default settings  
526 with a p-value of 0.05. To filter out non-reproducible peaks, called peaks from biological  
527 replicates were processed through the Irreproducible Discovery Rate (IDR) framework  
528 implemented in R<sup>36</sup>.

529

### 530 **Differential counting, heatmaps, and average profiles**

531 For ChIP-seq and ATAC-seq, a union list of the MACS2 called peaks per sample not  
532 filtered by IDR was generated using bedtools merge<sup>37</sup>, and raw reads covering each  
533 region were recovered from bam files using bedtools multicoverage. For RNA-seq, raw  
534 reads on reference genes were recovered using HOMER (version 4.8<sup>38</sup>  
535 analyzeRepeats.pl command). To test for differential counting, raw reads were  
536 compared using DESeq2 package implemented in R<sup>39</sup>, and filtered based on an  
537 adjusted p-value of < 0.05 and 2 fold change. For heatmaps and average profiles, tag

538 counts were recovered +/- 2 kb from the peak summit using HOMER annotatePeaks.pl  
539 command with -hist 25 -ghist or -hist 25 parameters. Heatmap images were generated  
540 using Java TreeView<sup>40</sup>. Average profiles and scatter plots were plotted using Python  
541 matplotlib.

542

### 543 **Motif discovery and Gene Ontology**

544 *De novo* motif discovery was performed using Homer findMotifsGenome function with –  
545 size 200 as a parameter. Gene ontology analysis was performed using DAVID<sup>41</sup> for  
546 RNA-seq data and GREAT<sup>42</sup> for ChIP-seq and ATAC-seq data.

547

### 548 **Chromatin state determination**

549 ChromHMM software<sup>43</sup> was used to learn and identify chromatin states as instructed in  
550 the manual. Encode chromatin segmentation using ChromHMM was used as a  
551 reference to label each state using a custom script using bedtools intersect. The  
552 enrichment of each state for a set of peaks was calculated using the  
553 NeighborhoodEnrichment command and compared among samples using a custom  
554 script. Enrichments were plotted using Python matplotlib library.

555

### 556 **Analysis of UMI-4C data**

557 UMI-4C data was aligned and analyzed using HiC-Pro<sup>44</sup> and the DpnII segmented  
558 genome annotation file. Interaction matrices of 5 kb resolution were generated and used  
559 to create Virtual 4C profiles through a custom python script and the matplotlib library.

560

### 561 **Analysis of cohesin HiChIP data**

562 HiChIP paired end reads were aligned to hg19 using HiC-Pro<sup>44</sup>. Duplicate reads were  
563 removed, assigned to Mbol restriction fragments, filtered for valid interactions, and then



564 used to generate binned interaction matrices of both 5 kb and 10 kb resolution. The 5 kb  
565 interaction matrices were used to visualize contacts by Virtual 4C, similar to the UMI-4C  
566 analysis. The 10 kb interaction matrix was used to call high confidence contacts (defined  
567 as counts  $\geq 10$ , FDR  $< 0.001$ ) using the contact caller, FitHiC<sup>23</sup>. Default FitHiC settings  
568 were used to generate an FDR for each bin pair. These high confidence cohesin  
569 contacts were used in the subsequent analyses.

570

### 571 **Contact connection analyses**

572 An element was considered participating, or anchored, in cohesin connections, if it  
573 possessed at least one high confidence contact bin in a given cell type. When  
574 considering ways in which p63 was connected to a TSS (defined as TSS  $\pm 5$  kb), four  
575 chromatin conformations were considered. 0° connections were defined as two elements  
576 overlapping in physical space (e.g. p63 BS contained within the TSS). 1° connections  
577 were defined as one element anchored in one bin of a cohesin contact and the second  
578 element anchored in the other bin. More complicated connections between elements  
579 were also considered: 2° connections were defined as two elements in distinct physical  
580 space both forming 1° connections to the same third element. Finally, 3° connections  
581 were when one element formed a 1° connection to a second element, which also formed  
582 a 1° connection to a third element, which also had a 1° connection to the fourth (target)  
583 element. All elements in both 2° and 3° configurations were in distinct physical space  
584 (i.e. non-overlapping).

585

### 586 **Differential contact analysis**

587 The Bioconductor package edgeR<sup>45</sup> was used to perform multiple comparison differential  
588 analysis of high confidence FitHiC contacts in d0, d0 p63GOF, d7 p63WT, and d7  
589 p63KO cells. The Anderson-Darling K-sample test, a modification of the K-S test, which

590 gives greater weight to the tails, was used to calculate statistical significance between  
591 populations of the fold change in contact connectivity<sup>46</sup>.

592

### 593 **Code Availability**

594 Custom scripts described in the Methods will be made available upon request.

595

### 596 **Data Availability**

597 All sequencing data will be available through Gene Expression Omnibus (GEO) –  
598 accession number pending.

599

600 **A Life Sciences Reporting Summary** for this publication is available.

601

602

- 603 28. Hsu, P.D., *et al.* DNA targeting specificity of RNA-guided Cas9 nucleases. *Nature*  
604 *biotechnology* **31**, 827-832 (2013).
- 605 29. Mali, P., Esvelt, K.M. & Church, G.M. Cas9 as a versatile tool for engineering  
606 biology. *Nature methods* **10**, 957-963 (2013).
- 607 30. Natsume, T., Kiyomitsu, T., Saga, Y. & Kanemaki, M.T. Rapid Protein Depletion  
608 in Human Cells by Auxin-Inducible Degron Tagging with Short Homology Donors.  
609 *Cell Rep* **15**, 210-218 (2016).
- 610 31. Buenrostro, J.D., Giresi, P.G., Zaba, L.C., Chang, H.Y. & Greenleaf, W.J.  
611 Transposition of native chromatin for fast and sensitive epigenomic profiling of  
612 open chromatin, DNA-binding proteins and nucleosome position. *Nature methods*  
613 **10**, 1213-1218 (2013).
- 614 32. Andrews, S. FastQC: a quality control tool for high throughput sequence data. .  
615 (2010).
- 616 33. Hwang, S., Kim, E., Lee, I. & Marcotte, E.M. Systematic comparison of variant  
617 calling pipelines using gold standard personal exome variants. *Sci Rep* **5**, 17875  
618 (2015).
- 619 34. Li, H., *et al.* The Sequence Alignment/Map format and SAMtools. *Bioinformatics*  
620 **25**, 2078-2079 (2009).
- 621 35. Zhang, Y., *et al.* Model-based analysis of ChIP-Seq (MACS). *Genome biology* **9**,  
622 R137 (2008).
- 623 36. Li, H. A statistical framework for SNP calling, mutation discovery, association  
624 mapping and population genetical parameter estimation from sequencing data.  
625 *Bioinformatics* **27**, 2987-2993 (2011).
- 626 37. Quinlan, A.R. & Hall, I.M. BEDTools: a flexible suite of utilities for comparing  
627 genomic features. *Bioinformatics* **26**, 841-842 (2010).

- 628 38. Heinz, S., *et al.* Simple combinations of lineage-determining transcription factors  
629 prime cis-regulatory elements required for macrophage and B cell identities.  
630 *Molecular cell* **38**, 576-589 (2010).
- 631 39. Love, M.I., Huber, W. & Anders, S. Moderated estimation of fold change and  
632 dispersion for RNA-seq data with DESeq2. *Genome biology* **15**, 550 (2014).
- 633 40. Saldanha, A.J. Java Treeview--extensible visualization of microarray data.  
634 *Bioinformatics* **20**, 3246-3248 (2004).
- 635 41. Huang da, W., Sherman, B.T. & Lempicki, R.A. Systematic and integrative  
636 analysis of large gene lists using DAVID bioinformatics resources. *Nature*  
637 *protocols* **4**, 44-57 (2009).
- 638 42. McLean, C.Y., *et al.* GREAT improves functional interpretation of cis-regulatory  
639 regions. *Nature biotechnology* **28**, 495-501 (2010).
- 640 43. Ernst, J. & Kellis, M. ChromHMM: automating chromatin-state discovery and  
641 characterization. *Nature methods* **9**, 215-216 (2012).
- 642 44. Servant, N., *et al.* HiC-Pro: an optimized and flexible pipeline for Hi-C data  
643 processing. *Genome biology* **16**, 259 (2015).
- 644 45. Anders, S., *et al.* Count-based differential expression analysis of RNA  
645 sequencing data using R and Bioconductor. *Nature protocols* **8**, 1765-1786  
646 (2013).
- 647 46. Scholz, F. & Stephens, M. K-Sample Anderson-Darling Tests. *J Am Stats Assoc*  
648 **82**, 918-924 (1987).

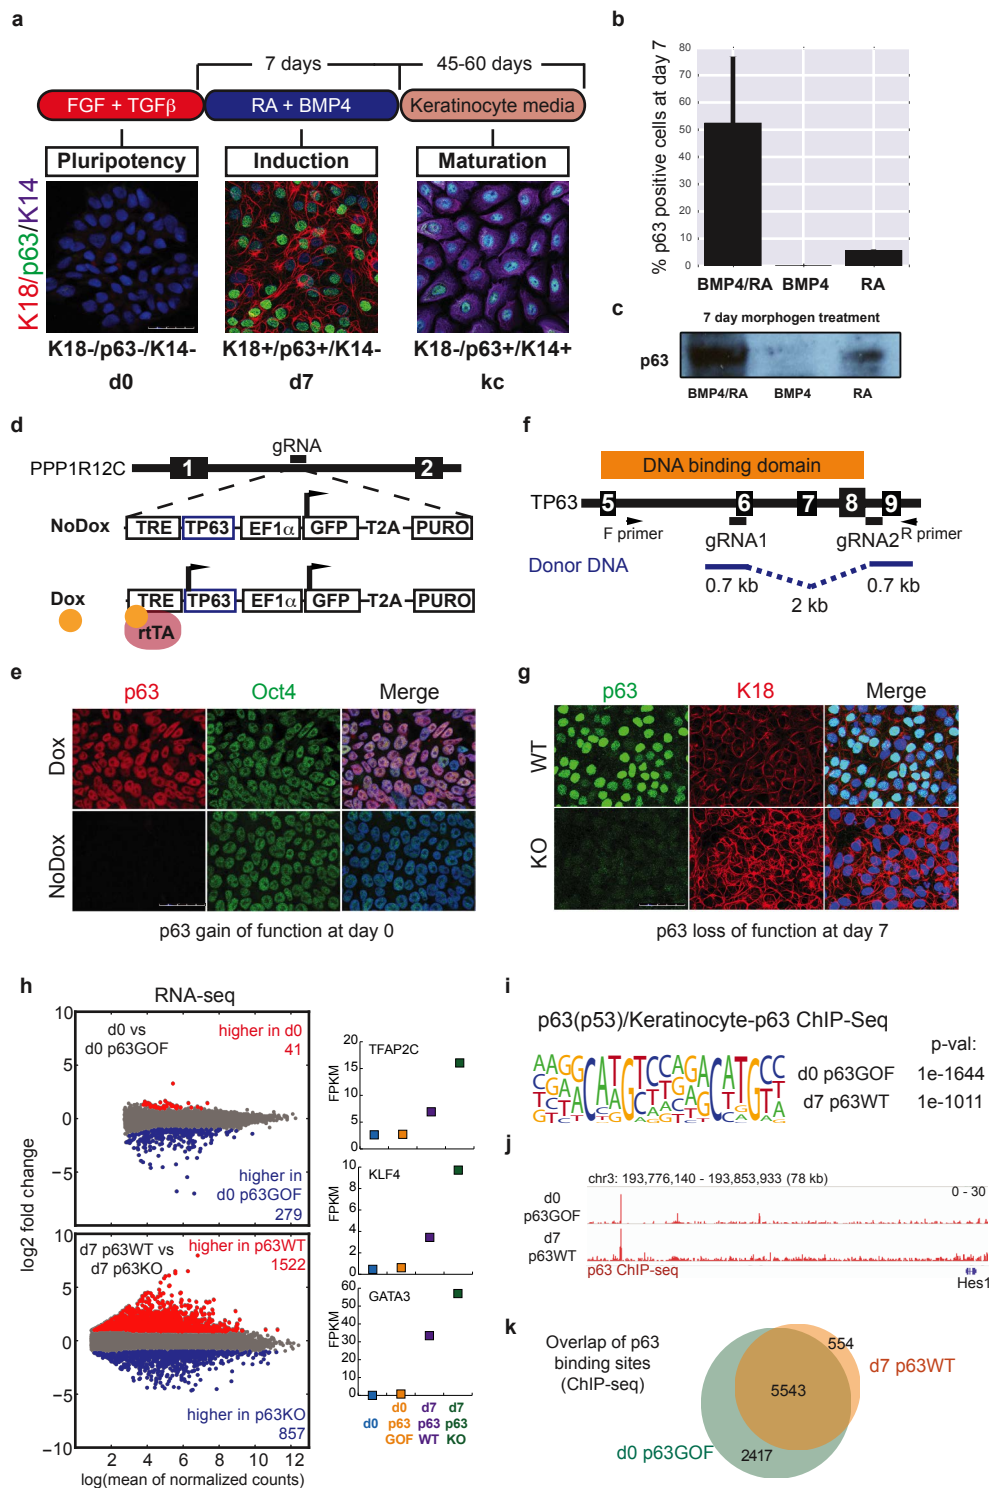

**Figure 1.** Morphogens and the lineage selector p63 cooperate to drive early stratified epithelial differentiation. (a) Differentiation of hESCs into keratinocytes takes 60 days in the xeno-free, defined system. Treatment with RA and BMP4 for 7 days induces K18 and p63 expression. Switching the cells into keratinocyte media allows for selection and growth of functional keratinocytes (kc) that express K14 and p63. (b,c) hESCs need exposure to both RA and BMP4 to achieve high p63 expression. Error bars represent standard deviation. (d) Strategy for generating the d0 p63GOF cell line. Numbered black boxes signify exons. (e) Expression of p63 in the d0 p63GOF line, showing even with Dox treatment, there is no loss in Oct4 expression. (f) Strategy for generating the p63KO line, using a two gRNA CRISPR/Cas9 approach. (g) IF validation of the p63KO line, showing loss of p63 expression and higher levels of K18. All IF scale bars represent 50  $\mu$ m. (h) Differential expression analysis from RNA-seq (measured by DESeq2) between the d0 and d0 p63GOF lines (upper panel), and the d7 p63WT and p63KO lines (lower panel). The gray dots on the scatter plot represent no change in gene expression between the two cell types, while red represents increased expression in the d0 or d7 wild type by a  $> 2$  fold change and blue represents decreased expression in the d0 or d7 wild type by a  $< -2$  fold change. Key transcription factors associated with epithelial development are induced by the morphogens and repressed by p63 at d7. (i) The p63 motif was the most significantly recovered motif under p63 ChIP-seq peaks in d0 p63GOF and d7 p63WT cells. (j) p63 binds distal to TSSs as depicted at the *HES1* locus (70 kb away) and to the same sites in d0 p63GOF and d7 p63WT. (k) p63 binds to similar sites genome-wide with and without morphogen presence, as depicted in the Venn Diagram. The majority of the d7 p63 binding sites are fully recovered in the d0 p63GOF line.

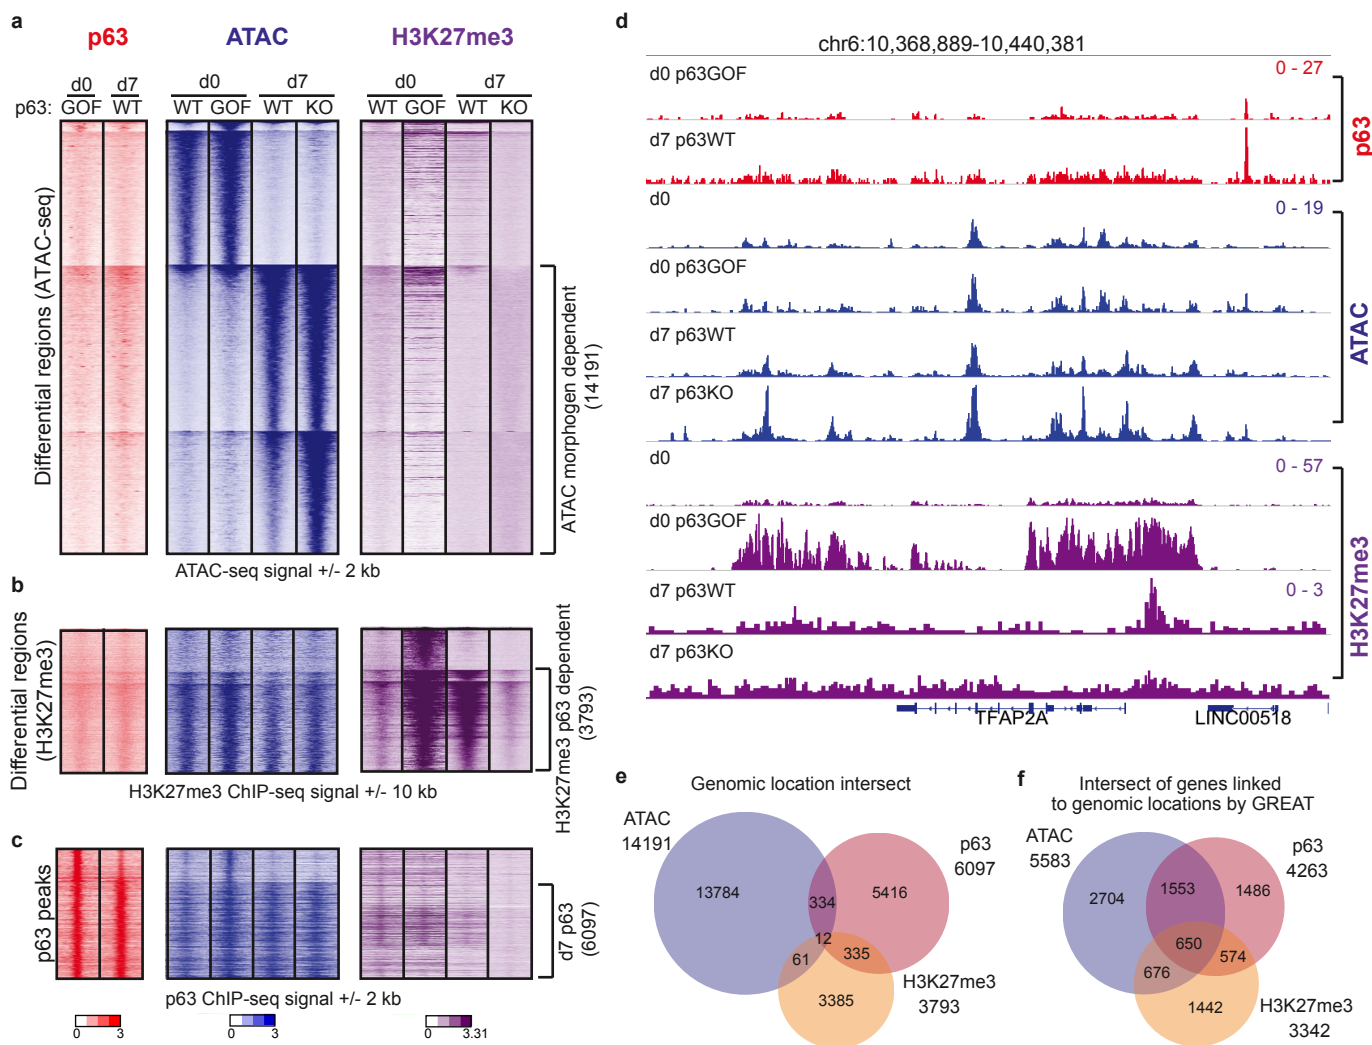

**Figure 2.** The morphogens establish an epigenetic landscape that p63 modifies at a distance. (a) Differential accessible regions between d0 and d7 p63WT as analyzed using DESeq2 on ATAC-seq signal. Heatmaps represent the signal at these ATAC regions within the various cell types and assays: p63 ChIP-seq signal (red, left panel), ATAC-seq signal (blue, middle panel), and H3K27me3 ChIP-seq signal (purple, right panel). 14,191 differential regions become more accessible upon morphogen treatment (morphogen-dependent). (b) Differential H3K27me3 regions between d7 p63WT and p63KO as analyzed by DESeq2. Heatmaps represent the same datasets as (a) only signal is shown at differential H3K27me3 sites (3,793 sites). (c) ATAC-seq (blue) and H3K27me3 (purple) signal at p63 binding sites (red). (d) Signal intensities of p63 ChIP-seq, ATAC-seq, and H3K27me3 ChIP-seq shown at the *TFAP2A* locus. (e) The overlap of genomic regions that are differential as measured in (a), (b), and (c). The genomic location intersect is very low. (f) GREAT analysis linking the above differential regions to the closest gene shows that these elements converge on a similar gene set. While their physical genomic locations do not overlap, they are linked to a common gene via GREAT.



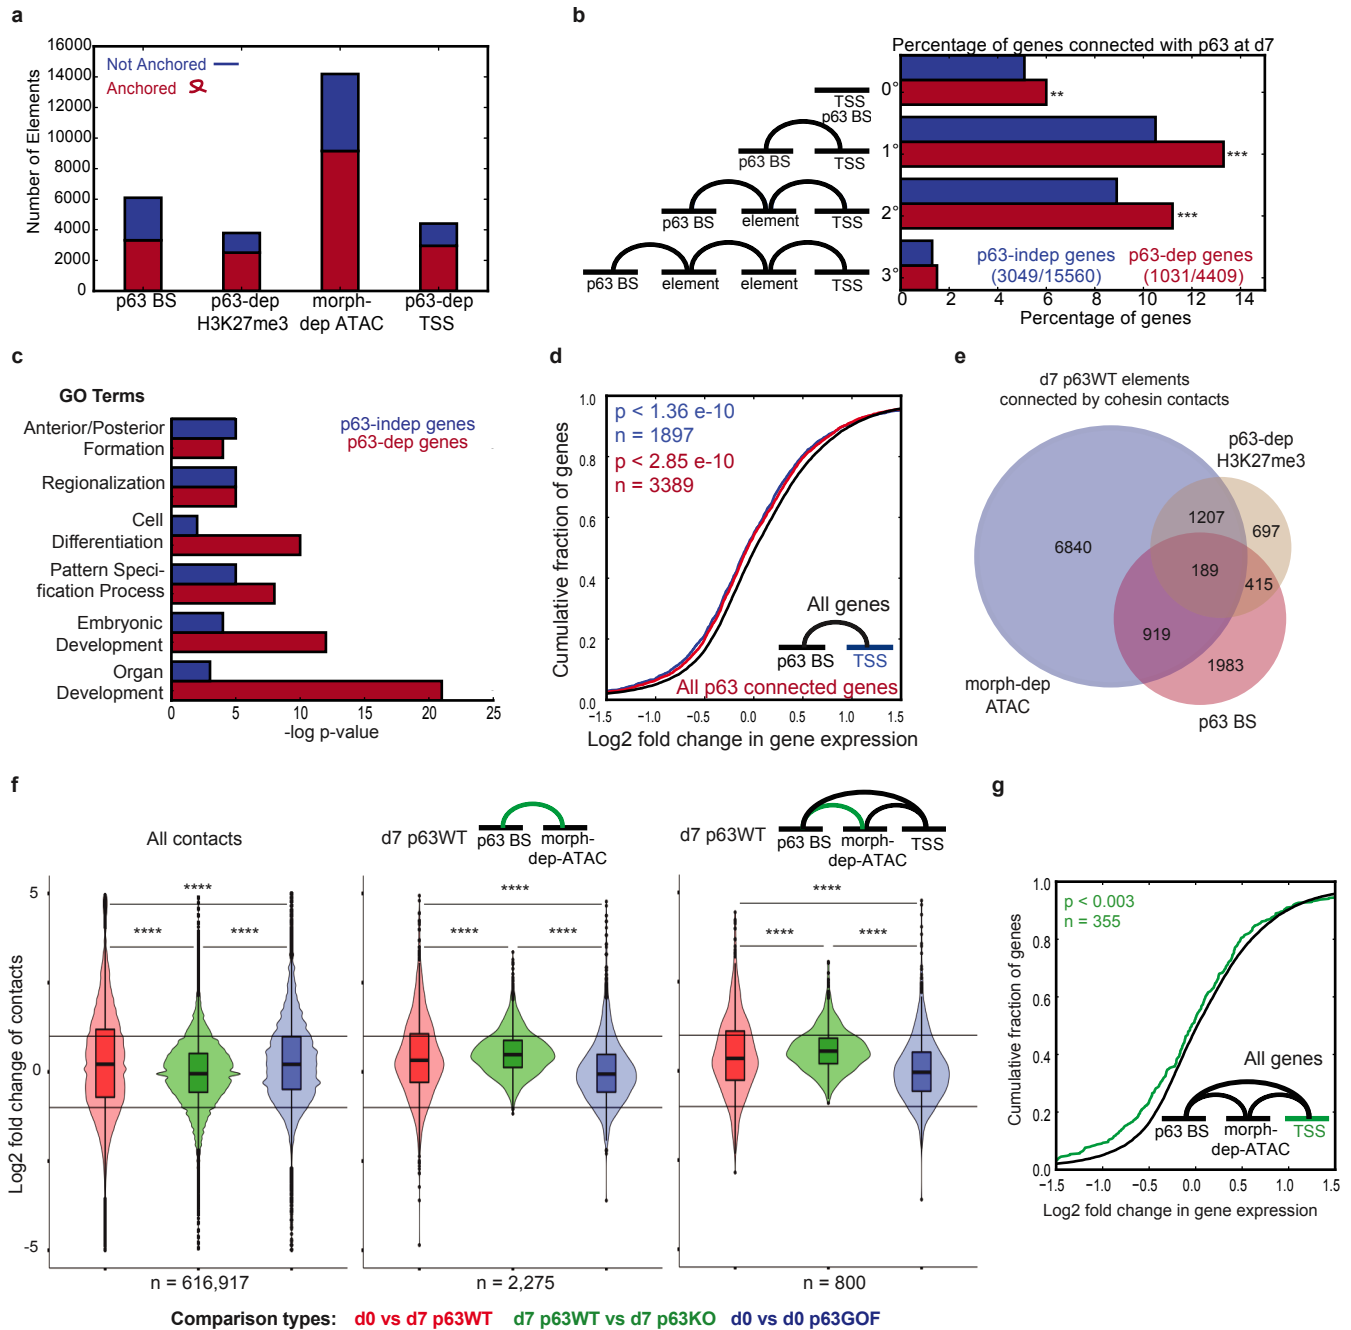

**Figure 3.** p63 - TSS connections are associated with negative regulation genome-wide. (a) Number of p63 binding sites (BS), p63-dependent (p63-dep) H3K27me3 sites, morphogen-dependent (morph-dep) ATAC sites, and p63-dependent TSSs that participate in chromatin looping (Anchored, red) vs those that do not (Not Anchored, blue) in d7 p63WT cells. (b) Percentage of p63-independent (p63-indep) genes (blue) and p63-dep genes (red), whose TSS is connected to p63 by direct binding (0°), direct contact (1°), or connected via one (2°) or two (3°) morph-dep ATAC and/or p63-dep H3K27me3 elements. (c) Gene Ontological Terms associated with p63-indep genes (blue) and p63-dep genes (red), which are connected to p63. (d) ecdf of the log2 fold change in gene expression between d7 p63WT vs d7 p63KO cells (d7 p63KO / d7 p63WT) for all p63 connected genes (red) and p63 1° connected genes (blue) compared to all genes (black). (e) 1° contact connections between p63 BS (red), p63-dep H3K27me3 (gold), and morph-dep ATAC (blue). (f) Change in connectivity strength between various cell types of all contacts (left panel), p63 - morph-dep ATAC contacts (middle panel), and p63 - morph-dep ATAC contacts in which both elements are connected to the TSS (right panel). n = number of contacts. (g) ecdf of the change in expression level (d7 p63KO / d7 p63WT) of genes whose TSS is connected to a p63 BS and morph-dep ATAC site, which in turn are connected to each other (green) compared to all genes (black). FDR by monte carlo simulation \*\*FDR<0.01,\*\*\*FDR<0.001. Angela-Darling k-samples test \*\*\*\*P<1x10<sup>-10</sup>.

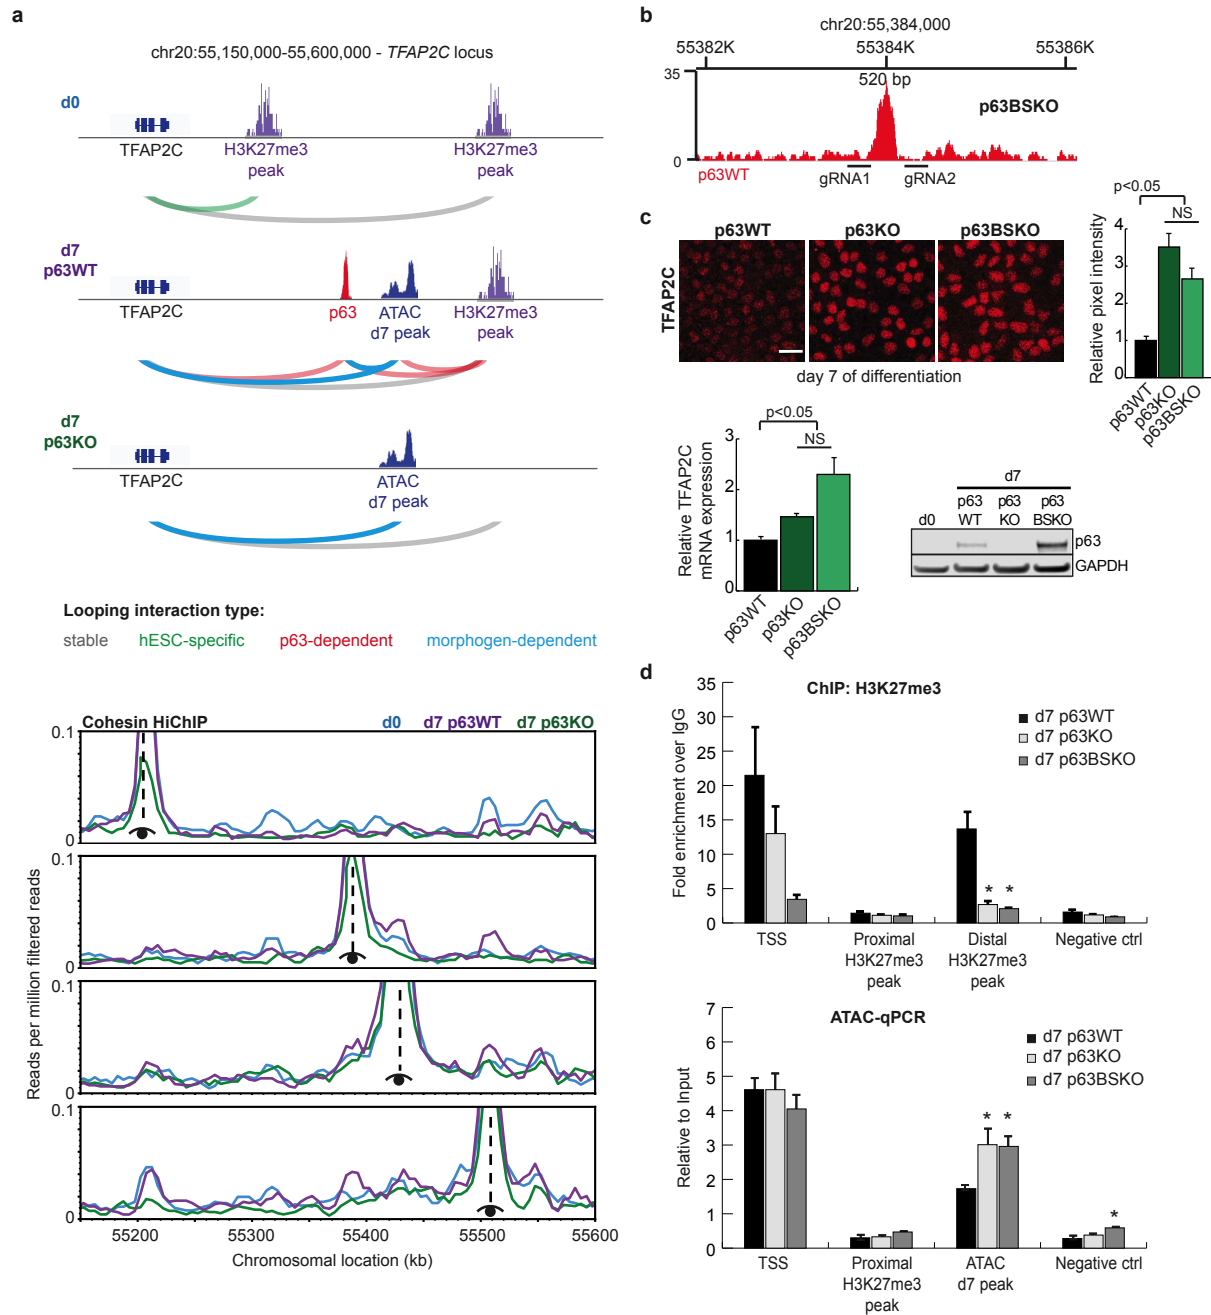

**Figure 4.** p63 negatively regulates *TFAP2C* expression through morphogen-induced and p63-dependent distal elements and connectivity. (a) Cohesin HiChIP reveals complex looping interactions between numerous distal elements at the *TFAP2C* locus. Schematic for the morphogen and p63-dependent interactions (top panel) with virtual 4C plots of the normalized cohesin HiChIP data below (bottom panel). (b) The p63 binding site was deleted using CRISPR/Cas9 to determine the effects of its loss on *TFAP2C* expression. p63BSKO is a 520 bp deletion surrounding the p63 ChIP-seq peak. (c) Deletion of the p63 binding site leads to an increase in *TFAP2C* expression similar to the levels seen in the d7 p63KO cells (NS - not significant). Loss of *TFAP2C* expression also leads to a dramatic increase in p63 expression. Relative pixel intensity was calculated from 3 independent images and scale bars represent 20  $\mu\text{m}$ . (d) ChIP-qPCR for H3K27me3 at the *TFAP2C* locus shows a decrease in the histone mark in the d7 p63BSKO cells, similar to the d7 p63KO cells (\*p-value < 0.01). ATAC-qPCR at this locus shows an increase in accessibility at the d7 ATAC peak in d7 p63BSKO, again similar to the d7 p63KO (\*p-value < 0.05). Deletion of the p63 binding site results in a loss of tightly controlled *TFAP2C* expression. Both graphs depict signal relative to input and error bars represent standard error of the mean.
